# Supplementary material for: The management effectiveness of protected areas in Kenya
Source: Springer Nature journal article supplement (doi:10.1007/s10531-021-02276-7), 2021-09-13
Supplement: MOESM2 [file 19659392]

---

## Online Resource 2

---

### The management effectiveness of protected areas in Kenya

Kenneth Otieno Onditi <sup>1,2,3,4#</sup>, Xueyou Li <sup>1#</sup>, Wenyu Song <sup>1,2</sup>, Quan Li <sup>1</sup>, Simon Musila <sup>3,4</sup>, James Mathenge <sup>5</sup>, Esther Kioko <sup>3,4</sup>, Xuelong Jiang <sup>1,4\*</sup>

<sup>1</sup> State Key Laboratory of Genetic Resources and Evolution, Kunming Institute of Zoology, Chinese Academy of Sciences, Kunming, China

<sup>2</sup> Kunming College of Life Sciences, University of Chinese Academy of Sciences, Kunming, China

<sup>3</sup> Department of Zoology, National Museums of Kenya, Nairobi, Kenya

<sup>4</sup> Sino-Africa Joint Research Centre, Chinese Academy of Sciences, Nairobi, Kenya

<sup>5</sup> Kenya Wildlife Service, Nairobi, Kenya

# contributed equally

\* Correspondence; email: jiangxl@mail.kiz.ac.cn, telephone: +86 871 6512 5226

### Contents

---

**ESM\_1** Extended explanation of how various biodiversity indices were derived (*Section 2.4: Estimation of diversity indices*). Refer to the main manuscript for the bibliography of citations.

**ESM\_2** Comparison of diversity indices between designation categories in the full dataset with unequal number of PAs per category and in a randomly-sampled dataset with equal number of protected areas per category.

**ESM\_3** Tests of statistical significances of variances in diversity indices shown in Table 2 explained by various PA categorisations. The values show the type III sum of squares analysis of variance of significances of differences in count of species composition [AS], averaged species richness [SR], averages of diversity indices less correlated with SR: phylogenetic mean pairwise distance [MPD], functional mean pairwise distance [FD<sup>MPD</sup>], phylogenetic nearest relative distance [NRI], phylogenetic nearest taxon distance [NTI], functional nearest relative distance [FD<sup>NRI</sup>], and functional nearest taxon distance [FD<sup>NTI</sup>]

- ESM\_4** The representation of species and species ranges in protected areas in Kenya. a) Bar plots of count of unique terrestrial mammal species in protected areas, PAs, in Kenya showing the number of PAs species are represented in by ordinal classification. b) the relative proportion of species ranges overlapping in PAs, contrasting representations in all PAs, SPAs, and PPAs.
- ESM\_5** Bivariate correlations between diversity indices of terrestrial mammals in protected areas in Kenya based on Pearson's  $r$ . \* indicate statistically significant ( $p < .05$ ) associations
- ESM\_6** The distribution of multidimensional diversity metrics of terrestrial mammals in protected areas in Kenya modeled using the centroid latitudes and longitudes of PAs as predictors and diversity indices as responses (**a**). The biogeographic regionalization of PAs based on species phylogenetic dissimilarity are shown in **b**, with the boxplots comparing mean species richness between the biogeographic regions
- ESM\_7** Summary of relative proportion of species range overlaps in protected areas and Marxan results for the best-solution conservation priority areas.
- ESM\_8** The association between species richness and PA status year and PA size, for a) focal species (as defined in the main text) and b) small mammals - Chiroptera and Rodentia orders. The scatter plots are partitioned by PA designation categories. Refer to Fig. 3 in the manuscript for the combined species pool plots.
- ESM\_9** Exploring the association between PA governance and designation categories on the diversity of terrestrial mammal in Kenya. The values represent the test for statistical significances of the variance in diversity indices explained by differences in PA governance and designation categorizations. Only metrics that are not highly correlated were included in the analysis [SR,  $FD^{MPD}$ , NRI, NTI,  $FD^{NRI}$ ,  $FD^{NTI}$ , see Online Resource 5 for the bivariate correlation between indices]
- ESM\_10** The phylogenetic and functional structure of protected areas in Kenya based on terrestrial mammals. The bar plots show the distribution of phylogenetic [NRI] and functional [FDNRI] nearest relative index and phylogenetic [NTI] and functional [FDNTI] nearest taxon index shaded by the designation type. -(negative) values indicate overdispersion while +(positive) values indicate clustering. The results are partitioned by various species groups around the so-called focal species as explained in the main text. There are 400 bars each representing a single a protected area.
- ESM\_11** Multilevel comparison of diversity indices of terrestrial mammals in PAs in Kenya between governance and designation categories. Comparison was implemented for SR and the diversity indices not highly correlated with SR [see Online Resource 6 for the correlations between diversity indices]

**ESM\_1** Extended explanation of how various biodiversity indices were derived (*Section 2.4: Estimation of diversity indices*). Refer to the main manuscript for the bibliography of the citations.

## **Estimation of diversity indices**

---

The species, phylogeny, traits, and metadata datasets were sorted to correspond using the functions *match.phylo.comm* and *match.phylo.data* in R package *picante* (Kembel *et al.* 2010) and the *all.equal* function in the *base* package (R Core Team 2020). The species richness [SR] per PA was estimated by summing the unique species in a PA using the *specnumber* function in the R package *vegan* (Oksanen *et al.* 2019). We also computed between-PA species dissimilarity distances using the *vegdist* function in *vegan*, then translated the distances to ultrametric dendrograms using the unweighted pair group method with arithmetic mean to visually demonstrate whether PAs were uniquely clustered based on governance and designation categories (Fig. 1). The phylogenetic diversity was estimated using Faith's phylogenetic diversity index [ $PD^{RIC}$ ] (Faith 1992), mean pairwise distance [MPD], and mean nearest taxon distance [MNTD] (Webb *et al.* 2002; Webb and Donoghue 2005). The  $PD^{RIC}$  index quantifies the phylogenetic richness by summing the branch lengths of a phylogenetic tree connecting all species in a sampling unit (Faith 1992) while MPD and MNTD estimate the mean pairwise phylogenetic distance between all species [net relatedness] in a sampling unit and the pairwise phylogenetic distance between a species and its closest relative [nearest congener], respectively. Accordingly, MPD relays phylogenetic mechanisms at basal relationships while MNTD relays these dynamics at late evolutionary processes (Webb *et al.* 2002; Webb and Donoghue 2005). We further assessed the phylogenetic structure of PAs using the standardized effect sizes [SES] of MPD and MNTD, i.e., nearest relative [NRI] and nearest taxon [NTI], respectively. When compared to a null model community, the NRI and NTI indicate whether sampled communities are phylogenetically more related/clustered [positive values] or less related/over-dispersed [negative values] than expected by chance. We used null communities generated using 1000 iterations through 9999 randomizations based on the independent swap algorithm (Gotelli and Entsminger 2003), which shuffles species occurrences in communities while maintaining their occurrence frequency within the community (Kembel 2009), to generate null model communities. The algorithm was preferred because it combines good Type I error rates with power to detect niche-based assembly processes and is better-suited at detecting niche processes when multiple traits are involved in community assembly (Kembel 2009). The  $PD^{RIC}$  was derived using the *ses.pd* function of *picante* while MPD and NRI and MNTD and NTI were derived using the *ses.mpd* and *ses.mntd* functions in *picante*, respectively.

For functional diversity, we estimated the mean pairwise trait distance separating species in a PA [ $FD^{MPD}$ ] and the mean nearest taxon distance [ $FD^{MNTD}$ ] as indices of functional divergence using a Gower distance matrix of the functional traits (Webb *et al.* 2002; Webb *et al.* 2008). Like the phylogenetic diversity computations, we inferred the SES of  $FD^{MPD}$  and  $FD^{MNTD}$  [ $FD^{NRI}$  and  $FD^{NTI}$ , respectively] to estimate whether the distribution/regularity of functional traits within a PA was lesser or greater than expected when compared to a null-model community. The estimations were implemented using the same functions of the *picante* package – *ses.mpd* and *ses.mntd*. We similarly applied the independent swap algorithm with 1000 iterations through 9999 randomizations when generating null model communities for inferring  $FD^{NRI}$  and  $FD^{NTI}$ .

We further evaluated the functional richness in a PA using Vileger *et al.* (2008)'s functional richness [FD<sup>RIC</sup>] index as implemented in the R package *FD* (Laliberté *et al.* 2014); the estimation is based on the trait space/volume occupied by a species within in a community (Cornwell *et al.* 2006; Vileger *et al.* 2008). A pairwise species trait matrix is generated using the Gower dissimilarity distance (Gower 1971), with the trait dimensionality then reduced using principal coordinates analysis [PCoA], and retaining only the first few axes capturing the highest variance in the input traits [we retained the first three PCoA axes which consistently retained >88% quality of the input trait space in all species groups].

The wholeness of species representation in various PA managements and designations relative to all the species found in PAs was assessed using completeness and uniqueness indices. The completeness index was derived as the log-transformed ratio of observed richness [SR]/dark diversity [i.e., Pärtel *et al.* (2013)]. The dark diversity represented the species absent from a particular PA but represented in others (Münzbergová and Herben 2004; Bello *et al.* 2016), and was derived using the *beals* function in R package *vegan*, which estimates the occurrence probability for a species presence in a community based on its joint occurrence with other species. We also derived PA level species uniqueness coefficients based on Pavoine and Ricotta (2019) using the *uniqueness* function in R package *adiv* (Pavoine and Goslee 2020). The complementarity between designation and governance PA categories based on dissimilarity of species composition was determined using Jaccard similarity coefficient.

**ESM\_2** Comparison of diversity indices between designation categories in the full dataset with unequal number of PAs per category and in a randomly-sampled dataset with equal number of protected areas per category.

**a) All cases**

| Designation type         |      | SR    | MPD   | FD <sup>MPD</sup> | NRI     | NTI     | FD <sup>NRI</sup> | FD <sup>NTI</sup> |
|--------------------------|------|-------|-------|-------------------|---------|---------|-------------------|-------------------|
| Community Conservancy    | Mean | 127   | 166.3 | 0.2073            | 0.0220  | 0.1576  | -0.3263           | -0.0149           |
|                          | SD   | 5     | 1.0   | 0.0020            | 0.2739  | 0.4885  | 0.1394            | 0.2752            |
| Community Nature Reserve | Mean | 100   | 164.8 | 0.2138            | 0.3552  | 0.0088  | -0.6249           | 0.0544            |
|                          | SD   | 17    | 1.8   | 0.0064            | 0.3110  | 0.3138  | 0.3279            | 0.3245            |
| Forest Reserve           | Mean | 116   | 166.0 | 0.2016            | 0.0805  | -0.0021 | 0.2232            | 0.0227            |
|                          | SD   | 18    | 1.0   | 0.0064            | 0.2017  | 0.3664  | 0.4461            | 0.2912            |
| National Park            | Mean | 113   | 165.6 | 0.2061            | 0.1497  | 0.1040  | -0.0410           | 0.2294            |
|                          | SD   | 29    | 1.8   | 0.0093            | 0.3224  | 0.4919  | 0.5113            | 0.2803            |
| National Reserve         | Mean | 104   | 165.2 | 0.2095            | 0.1989  | 0.0499  | -0.3242           | 0.1844            |
|                          | SD   | 22    | 2.0   | 0.0091            | 0.3365  | 0.3939  | 0.6224            | 0.3376            |
| Others                   | Mean | 110   | 166.1 | 0.2033            | -0.0131 | -0.1239 | 0.0269            | 0.0614            |
|                          | SD   | 21    | 1.3   | 0.0051            | 0.3242  | 0.4654  | 0.3691            | 0.2372            |
| Private Reserve          | Mean | 117   | 165.9 | 0.2048            | 0.1255  | -0.0530 | -0.0994           | -0.0314           |
|                          | SD   | 11    | 0.9   | 0.0040            | 0.2382  | 0.4143  | 0.3203            | 0.1572            |
|                          | SS   | 13012 | 61.4  | 0.0052            | 2.9559  | 1.6545  | 27.1934           | 1.6613            |
|                          | MS   | 2169  | 10.2  | 0.00              | 0.49    | 0.28    | 4.53              | 0.28              |
|                          | F    | 6     | 6.7   | 20.56             | 7.77    | 1.76    | 23.91             | 3.39              |
|                          | Sig. | 0.00  | 0.00  | 0.00              | 0.00    | 0.11    | 0.00              | 0.00              |

Community Conservancy, N = 22; Community Nature Reserve, N = 27; Forest Reserve, N = 234; National Park, N = 23; National Reserve, N = 30; Others, N = 48; Private Reserve, N = 16;  
 SS = Sum of Squares; MS = mean square; F = F statistics, Sig. = p-value

**b) Randomly-sampled cases**

| Designation type         |      | SR    | MPD   | FD <sup>MPD</sup> | NRI     | NTI     | FD <sup>NRI</sup> | FD <sup>NTI</sup> |
|--------------------------|------|-------|-------|-------------------|---------|---------|-------------------|-------------------|
| Community Conservancy    | Mean | 127   | 166.5 | 0.2072            | -0.0138 | 0.184   | -0.321            | -0.0342           |
|                          | SD   | 4     | 0.9   | 0.0021            | 0.2521  | 0.5049  | 0.1452            | 0.2798            |
| Community Nature Reserve | Mean | 100   | 164.7 | 0.214             | 0.3607  | -0.0101 | -0.6292           | 0.0497            |
|                          | SD   | 18    | 1.8   | 0.0064            | 0.312   | 0.312   | 0.3337            | 0.3403            |
| Forest Reserve           | Mean | 115   | 166.2 | 0.2036            | 0.0038  | 0.0086  | 0.0736            | 0.0955            |
|                          | SD   | 21    | 0.7   | 0.0069            | 0.1826  | 0.4652  | 0.4705            | 0.2897            |
| National Park            | Mean | 121   | 165.9 | 0.2043            | 0.0954  | 0.0667  | -0.0029           | 0.2034            |
|                          | SD   | 22    | 1.3   | 0.0077            | 0.2898  | 0.5053  | 0.5341            | 0.2901            |
| National Reserve         | Mean | 101   | 165.4 | 0.2092            | 0.1671  | 0.0714  | -0.2988           | 0.2418            |
|                          | SD   | 20    | 2.0   | 0.0102            | 0.3381  | 0.4006  | 0.6947            | 0.3279            |
| Others                   | Mean | 114   | 166.2 | 0.2018            | -0.0308 | -0.1259 | 0.1423            | 0.0604            |
|                          | SD   | 21    | 0.9   | 0.0047            | 0.2849  | 0.488   | 0.3897            | 0.2099            |
| Private Reserve          | Mean | 117   | 165.9 | 0.2048            | 0.1255  | -0.053  | -0.0994           | -0.0314           |
|                          | SD   | 11    | 0.9   | 0.004             | 0.2382  | 0.4143  | 0.3203            | 0.1572            |
|                          | SS   | 12039 | 46.6  | 0.00              | 2.25    | 1.17    | 8.78              | 1.31              |
|                          | MS   | 2006  | 7.8   | 0.00              | 0.37    | 0.19    | 1.46              | 0.22              |
|                          | F    | 6     | 4.7   | 7.83              | 4.90    | 0.97    | 7.33              | 2.78              |
|                          | Sig. | 0.00  | 0.00  | 0.00              | 0.00    | 0.45    | 0.00              | 0.01              |

SS: Sum of Squares; MS: mean square; Community Conservancy, N =20; Community Nature Reserve, N =20; Forest Reserve, N =20; National Park, N =20; National Reserve, N =20; Others, N =20; Private Reserve, N =16;

**ESM\_3** Tests of statistical significances of variances in diversity indices shown in Table 2 explained by various PA categorisations. The values show the type III sum of squares analysis of variance of significances of differences in count of species composition [AS], averaged species richness [SR], averages of diversity indices less correlated with SR: phylogenetic mean pairwise distance [MPD], functional mean pairwise distance [FD<sup>MPD</sup>], phylogenetic nearest relative distance [NRI], phylogenetic nearest taxon distance [NTI], functional nearest relative distance [FD<sup>NRI</sup>], and functional nearest taxon distance [FD<sup>NTI</sup>]. Significant *p* values in in bold.

|             | Index             | Type III <i>SS</i> | <i>MS</i> | <i>F</i> | <i>p</i>     | <i>R</i> <sup>2</sup> <sub>adj</sub> |
|-------------|-------------------|--------------------|-----------|----------|--------------|--------------------------------------|
| Governance  | AS                | NA                 | NA        | NA       | 0.920        | 0.004                                |
|             | SR                | 6698               | 1674      | 4.529    | <b>0.001</b> | 0.034                                |
|             | MPD               | 42.99              | 10.75     | 6.848    | <b>0.000</b> | 0.056                                |
|             | FD <sup>MPD</sup> | 0.003              | 0.001     | 17.91    | <b>0.000</b> | 0.145                                |
|             | NRI               | 2.516              | 0.629     | 9.774    | <b>0.000</b> | 0.081                                |
|             | NTI               | 1.334              | 0.334     | 2.128    | 0.077        | 0.011                                |
|             | FD <sup>NRI</sup> | 18.52              | 4.631     | 22.03    | <b>0.000</b> | 0.174                                |
|             | FD <sup>NTI</sup> | 0.279              | 0.070     | 0.818    | 0.514        | -0.002                               |
| Designation | AS                | NA                 | NA        | NA       | 0.380        | 0.016                                |
|             | SR                | 13012              | 2169      | 6.115    | <b>0.000</b> | 0.071                                |
|             | MPD               | 61.40              | 10.23     | 6.697    | <b>0.000</b> | 0.079                                |
|             | FD <sup>MPD</sup> | 0.005              | 0.001     | 20.556   | <b>0.000</b> | 0.227                                |
|             | NRI               | 2.956              | 0.493     | 7.766    | <b>0.000</b> | 0.092                                |
|             | NTI               | 1.655              | 0.276     | 1.764    | 0.105        | 0.011                                |
|             | FD <sup>NRI</sup> | 27.19              | 4.532     | 23.91    | <b>0.000</b> | 0.256                                |
|             | FD <sup>NTI</sup> | 1.661              | 0.277     | 3.386    | <b>0.003</b> | 0.035                                |
| GOV_TY      | AS                | NA                 | NA        | NA       | 0.970        | 0.000                                |
|             | SR                | 477.5              | 477.5     | 1.251    | 0.264        | 0.001                                |
|             | MPD               | 0.631              | 0.631     | 0.380    | 0.538        | 0.538                                |
|             | FD <sup>MPD</sup> | 0.002              | 0.002     | 40.74    | <b>0.000</b> | 0.091                                |
|             | NRI               | 0.018              | 0.018     | 0.259    | 0.611        | -0.002                               |
|             | NTI               | 0.404              | 0.404     | 2.564    | 0.110        | 0.004                                |
|             | FD <sup>NRI</sup> | 14.72              | 14.72     | 67.39    | <b>0.000</b> | 0.143                                |
|             | FD <sup>NTI</sup> | 0.093              | 0.093     | 1.093    | 0.296        | 0.000                                |
| GOV_TYM     | AS                | NA                 | NA        | NA       | 0.830        | 0.001                                |
|             | SR                | 2547               | 1274      | 3.374    | <b>0.035</b> | 0.012                                |
|             | MPD               | 18.14              | 9.070     | 5.593    | <b>0.004</b> | 0.023                                |
|             | FD <sup>MPD</sup> | 0.003              | 0.002     | 34.26    | <b>0.000</b> | 0.143                                |
|             | NRI               | 0.230              | 0.115     | 1.653    | 0.193        | 0.003                                |
|             | NTI               | 0.746              | 0.373     | 2.374    | 0.094        | 0.007                                |
|             | FD <sup>NRI</sup> | 20.63              | 10.31     | 50.51    | <b>0.000</b> | 0.199                                |
|             | FD <sup>NTI</sup> | 1.173              | 0.586     | 7.135    | <b>0.001</b> | 0.030                                |
| IUCN        | AS                | NA                 | NA        | NA       | 0.100        | 0.016                                |
|             | SR                | 4151               | 1384      | 3.697    | <b>0.012</b> | 0.020                                |
|             | MPD               | 13.55              | 4.515     | 2.758    | <b>0.042</b> | 0.013                                |
|             | FD <sup>MPD</sup> | 0.001              | 0.000     | 9.031    | <b>0.000</b> | 0.057                                |
|             | NRI               | 0.284              | 0.095     | 1.359    | 0.255        | 0.003                                |
|             | NTI               | 0.930              | 0.310     | 1.976    | 0.117        | 0.007                                |
|             | FD <sup>NRI</sup> | 6.080              | 2.027     | 8.395    | <b>0.000</b> | 0.053                                |
|             | FD <sup>NTI</sup> | 1.623              | 0.541     | 6.656    | <b>0.000</b> | 0.041                                |

*SS* = sum of squares, *MS* = mean squares (estimated variances), *F* = *F* statistics, *R*<sup>2</sup><sub>adj</sub> = adjusted r squared

**ESM\_4** The representation of species and species ranges in protected areas in Kenya. **a)** Bar plots of count of unique terrestrial mammal species in protected areas, PAs, in Kenya showing the number of PAs species are represented in by ordinal classification. **b)** the relative proportion of species ranges overlapping in PAs, contrasting representations in all PAs, SPAs, and PPAs.

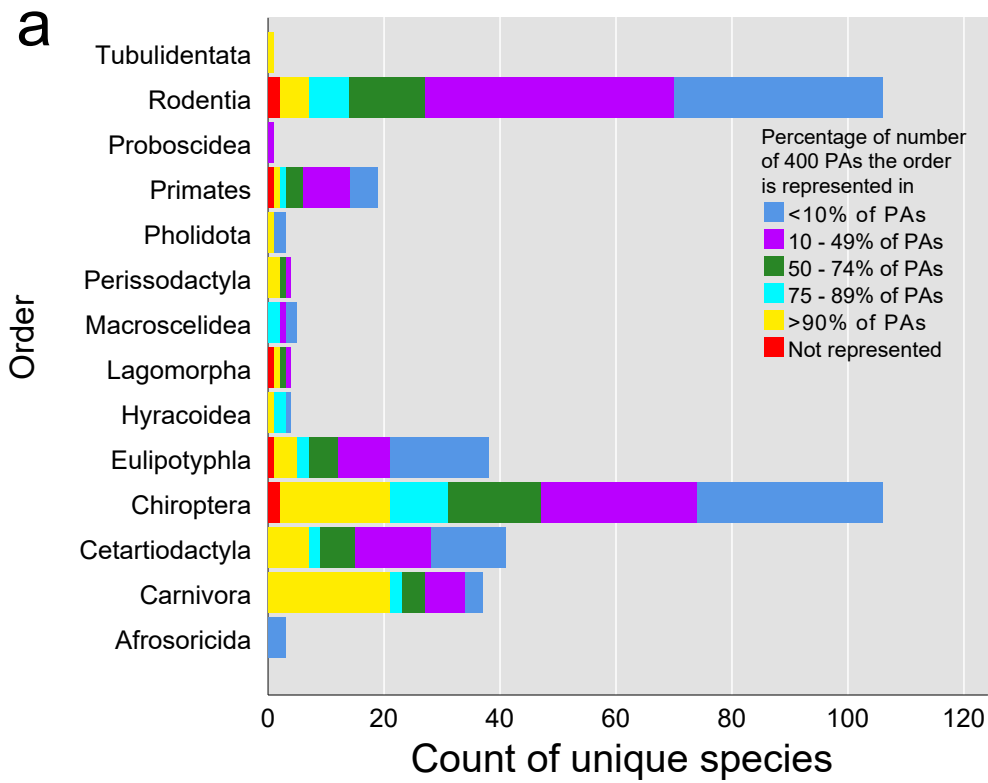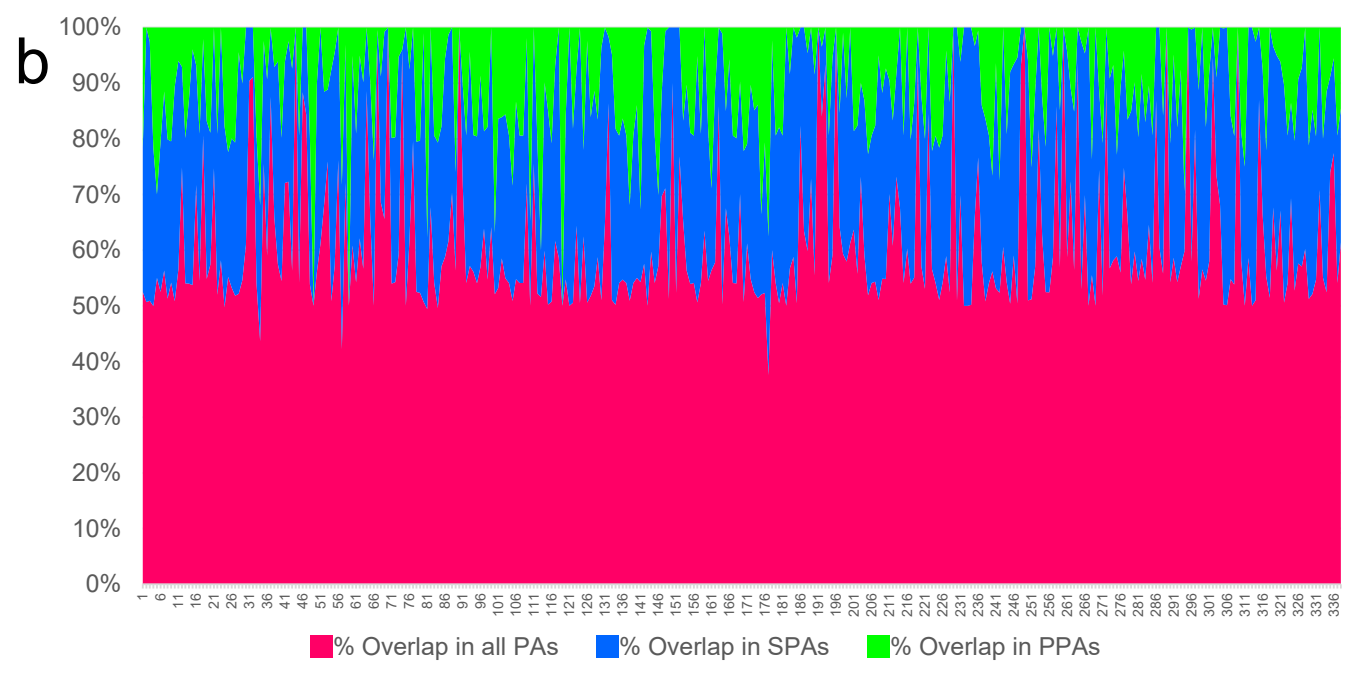

**ESM\_5** Bivariate correlations between diversity indices of terrestrial mammals in protected areas in Kenya based on Pearson's r. \* indicate statistically significant ( $p < .05$ ) associations

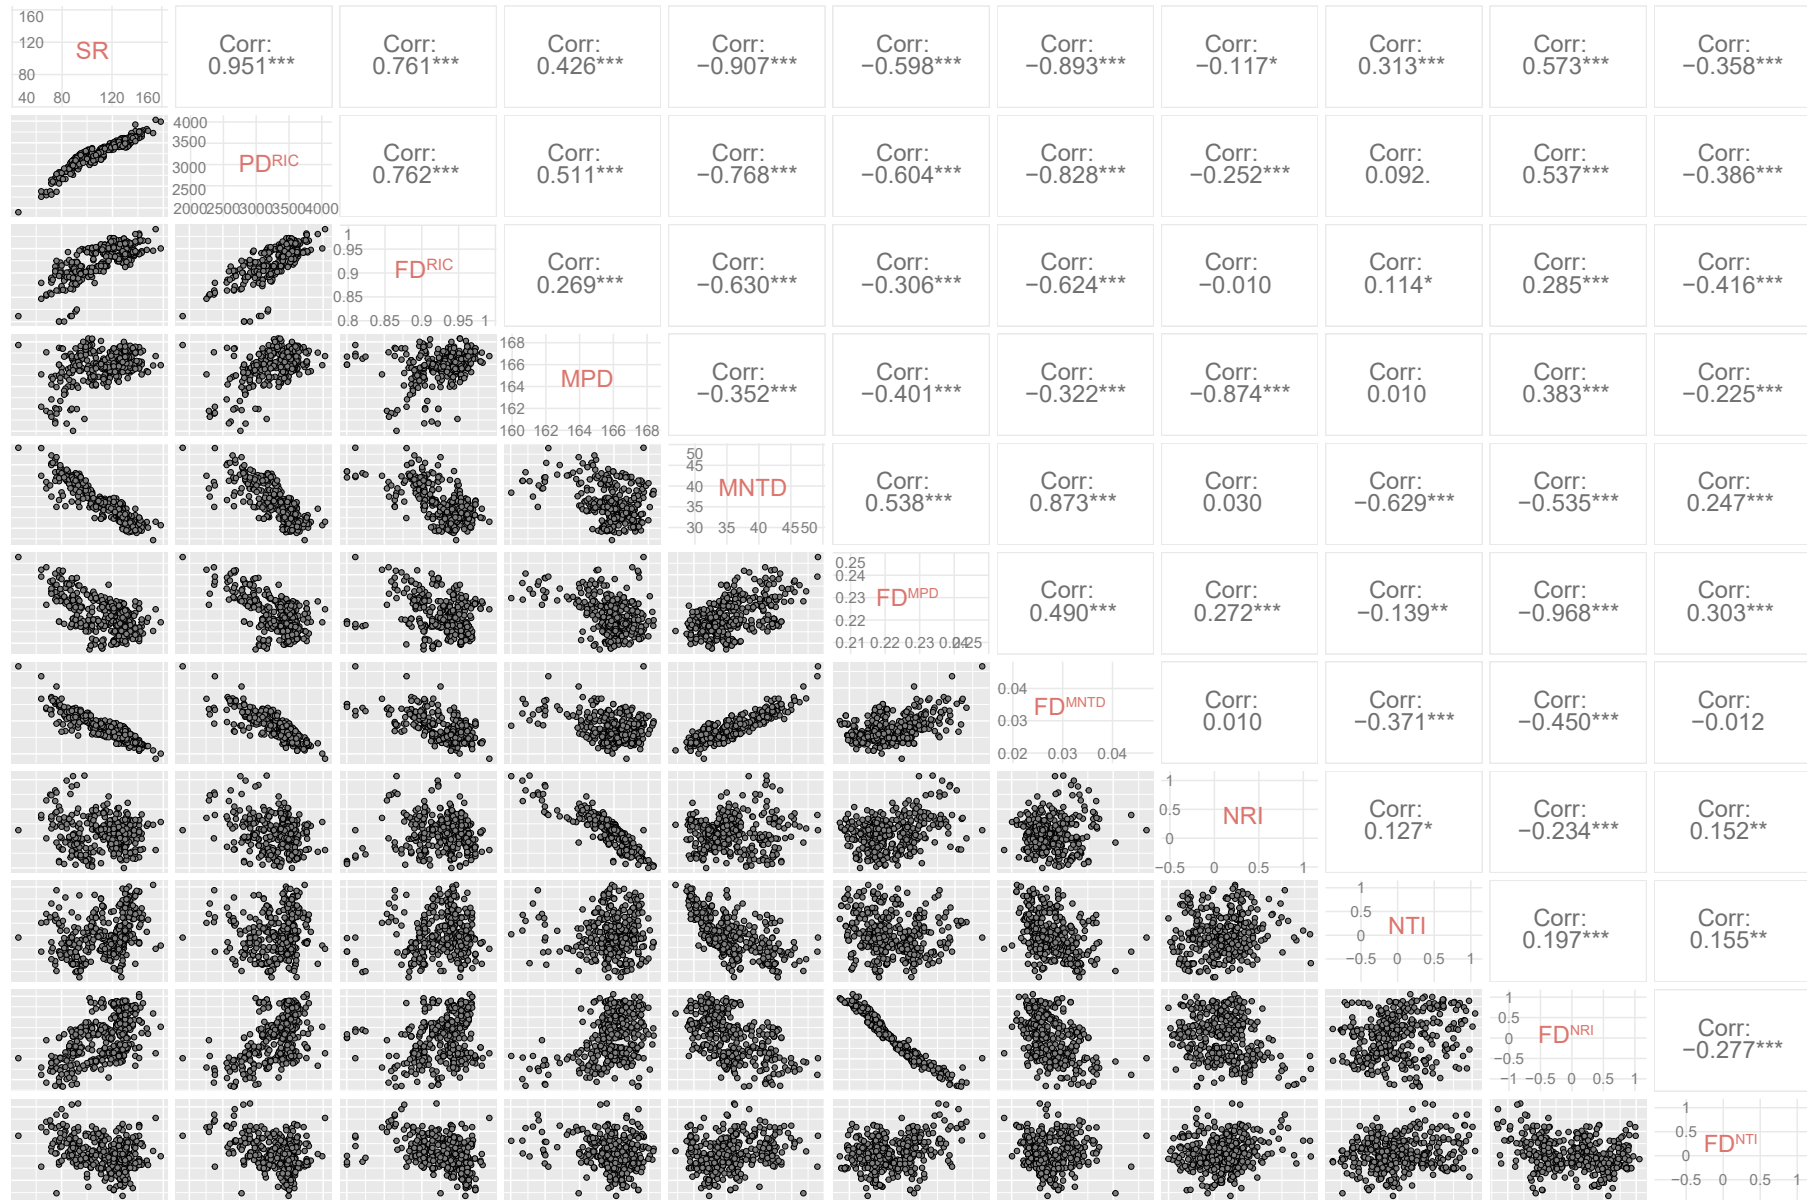

SR = species richness,  $PD^{RIC}$  = Faith's index of phylogenetic diversity, MPD = phylogenetic mean pairwise distance, MNTD = phylogenetic mean nearest taxon distance, NRI = nearest relative index [phylogenetic] NTI = nearest taxon index [phylogenetic],  $FD^{RIC}$  = Functional richness,  $FD^{MPD}$  = functional mean pairwise distance,  $FD^{MNTD}$  = functional mean nearest taxon distance,  $FD^{NRI}$  = functional nearest relative index  $FD^{NTI}$  = functional nearest taxon index



**ESM\_6** The distribution of multidimensional diversity metrics of terrestrial mammals in protected areas in Kenya modeled using the centroid latitudes and longitudes of PAs as predictors and diversity indices as responses (a). The biogeographic regionalization of PAs based on species phylogenetic dissimilarity are shown in b, with the boxplots comparing mean species richness between the biogeographic regions

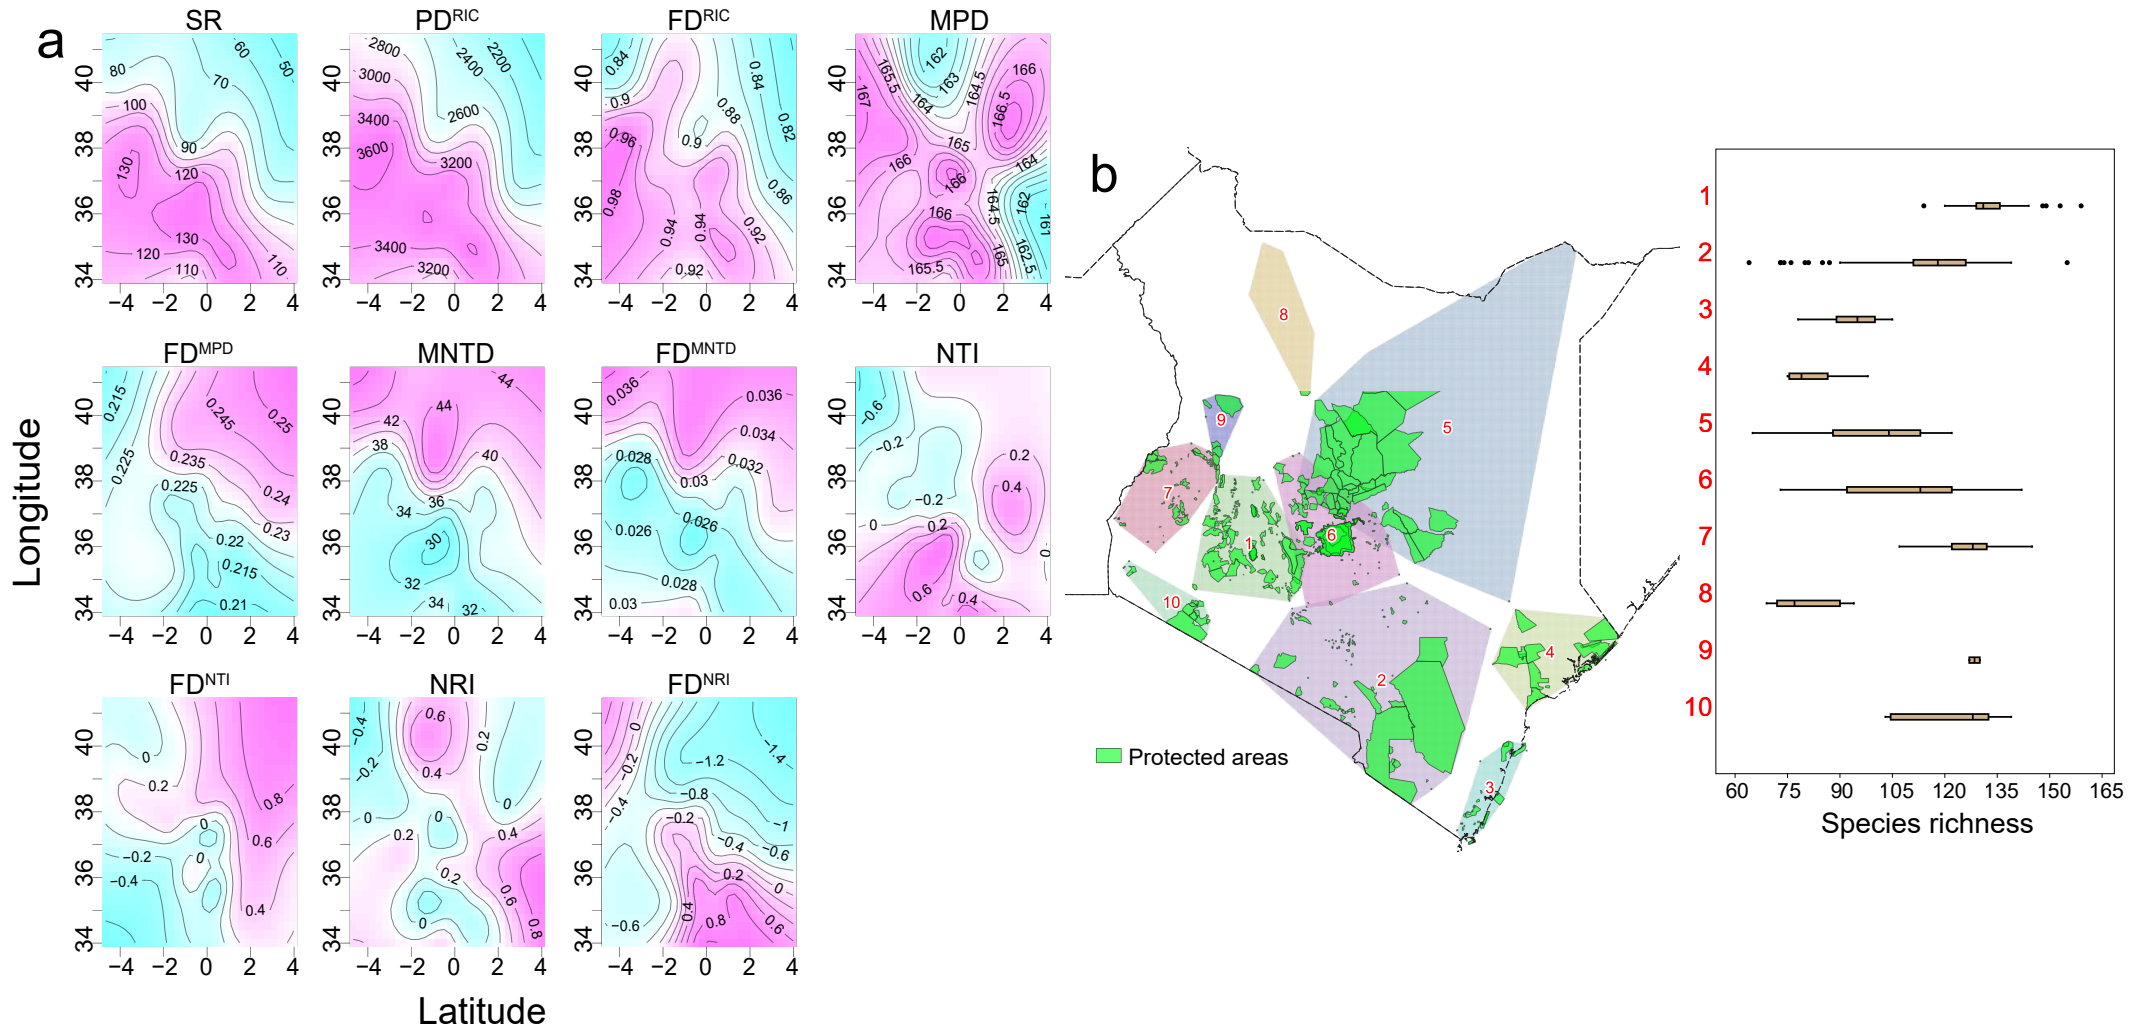

SR = species richness, PD<sup>RIC</sup> = Phylogenetic richness, FD<sup>RIC</sup> = Functional richness, MPD = phylogenetic mean pairwise distance, MNTD = phylogenetic mean nearest taxon distance, NRI = nearest relative index, NTI = nearest taxon index, FD<sup>MPD</sup> = mean pairwise distance based on functional traits, FD<sup>MNTD</sup> = mean nearest taxon distance based on functional, FD<sup>NRI</sup> = nearest relative index of FD<sup>MPD</sup>, FD<sup>NTI</sup> = nearest taxon index of FD<sup>MNTD</sup>

**ESM\_7** Summary of relative proportion of species range overlaps in protected areas and Marxan results for the best-solution conservation priority areas.

| Species                           | %Rep_in_PAs | %Rep_in_SPAs | 1/3_RTtarget | BSol_AllPAs | BSol_SPAs | Target_Met_? | MPM_AllPAs | MPM_[SPAs] |
|-----------------------------------|-------------|--------------|--------------|-------------|-----------|--------------|------------|------------|
| <i>Acinonyx jubatus</i>           | 17.19       | 8.48         | 11.54        | 11.66       | 11.64     | yes          | 1.00       | 1.00       |
| <i>Alcelaphus buselaphus</i>      | 20.85       | 13.81        | 4.39         | 5.48        | 6.60      | yes          | 1.00       | 1.00       |
| <i>Aonyx capensis</i>             | 18.09       | 8.74         | 13.00        | 13.09       | 13.01     | yes          | 1.00       | 1.00       |
| <i>Bdeogale jacksoni</i>          | 24.31       | 8.21         | 1.44         | 2.33        | 2.38      | yes          | 1.00       | 1.00       |
| <i>Bdeogale omnivora</i>          | 16.78       | 9.33         | 0.69         | 0.81        | 0.81      | yes          | 1.00       | 1.00       |
| <i>Beatragus hunteri</i>          | 19.09       | 12.49        | 0.30         | 0.31        | 0.30      | yes          | 1.00       | 1.00       |
| <i>Cephalophus adersi</i>         | 74.82       | 62.19        | 0.09         | 0.10        | 0.10      | yes          | 1.00       | 1.00       |
| <i>Cephalophus silvicultor</i>    | 48.97       | 5.20         | 0.17         | 0.18        | 0.19      | yes          | 1.00       | 1.00       |
| <i>Ceratotherium simum</i>        | 15.44       | 7.55         | 15.81        | 15.82       | 15.86     | yes          | 1.00       | 1.00       |
| <i>Cercocebus galeritus</i>       | 54.38       | 30.42        | 0.01         | 0.01        | 0.01      | yes          | 0.98       | 1.00       |
| <i>Connochaetes taurinus</i>      | 23.52       | 19.25        | 1.27         | 1.98        | 2.03      | yes          | 1.00       | 1.00       |
| <i>Crocidura allex</i>            | 24.06       | 7.52         | 0.05         | 0.05        | 0.06      | yes          | 1.00       | 1.00       |
| <i>Crocota crocuta</i>            | 15.34       | 7.51         | 15.91        | 15.91       | 15.94     | yes          | 1.00       | 1.00       |
| <i>Damaliscus lunatus</i>         | 17.16       | 10.27        | 1.55         | 1.77        | 2.05      | yes          | 1.00       | 1.00       |
| <i>Dendrohyrax validus</i>        | 8.89        | 5.36         | 0.10         | 0.11        | 0.11      | yes          | 1.00       | 1.00       |
| <i>Diceros bicornis</i>           | 15.63       | 7.65         | 15.61        | 15.63       | 15.62     | yes          | 1.00       | 1.00       |
| <i>Eidolon helvum</i>             | 20.38       | 13.72        | 3.50         | 4.88        | 5.66      | yes          | 1.00       | 1.00       |
| <i>Equus grevyi</i>               | 32.92       | 6.95         | 2.15         | 3.33        | 3.62      | yes          | 1.00       | 1.00       |
| <i>Equus quagga</i>               | 23.29       | 13.31        | 8.37         | 8.56        | 9.22      | yes          | 1.00       | 1.00       |
| <i>Giraffa camelopardalis</i>     | 19.72       | 11.07        | 8.58         | 8.99        | 10.22     | yes          | 1.00       | 1.00       |
| <i>Grammomys gigas</i>            | 92.19       | 90.18        | 0.05         | 0.05        | 0.05      | yes          | 1.00       | 1.00       |
| <i>Hippotragus equinus</i>        | 71.89       | 71.89        | 0.01         | 0.01        | 0.01      | yes          | 1.00       | 0.99       |
| <i>Hippotragus niger</i>          | 8.29        | 5.50         | 0.09         | 0.11        | 0.11      | yes          | 1.00       | 1.00       |
| <i>Hyaena hyaena</i>              | 15.34       | 7.51         | 15.91        | 15.91       | 15.94     | yes          | 1.00       | 1.00       |
| <i>Hydrictis maculicollis</i>     | 16.16       | 3.61         | 7.80         | 8.08        | 8.81      | yes          | 1.00       | 1.00       |
| <i>Hylochoerus meinertzhageni</i> | 21.04       | 5.60         | 2.14         | 3.32        | 3.62      | yes          | 1.00       | 1.00       |
| <i>Kobus ellipsiprymnus</i>       | 20.89       | 10.52        | 10.56        | 10.63       | 11.13     | yes          | 1.00       | 1.00       |
| <i>Litocranius walleri</i>        | 19.14       | 10.25        | 8.96         | 9.01        | 9.19      | yes          | 1.00       | 1.00       |
| <i>Loxodonta africana</i>         | 55.23       | 34.43        | 2.89         | 4.48        | 4.89      | yes          | 1.00       | 1.00       |
| <i>Lycyon pictus</i>              | 49.88       | 33.71        | 1.87         | 3.04        | 3.15      | yes          | 1.00       | 1.00       |
| <i>Oryx beisa</i>                 | 17.41       | 9.32         | 10.27        | 10.40       | 11.01     | yes          | 1.00       | 1.00       |
| <i>Otomops harrisoni</i>          | 17.06       | 0.00         | 0.00         | 0.00        | 0.00      | yes          | 1.00       | 1.00       |
| <i>Otomops martiensseni</i>       | 19.82       | 19.10        | 0.00         | 0.00        | 0.00      | yes          | 1.00       | 1.00       |
| <i>Otomys barbouri</i>            | 91.85       | 91.85        | 0.00         | 0.00        | 0.00      | yes          | 1.00       | 1.00       |
| <i>Panthera leo</i>               | 39.76       | 25.68        | 3.67         | 5.42        | 6.07      | yes          | 1.00       | 1.00       |
| <i>Panthera pardus</i>            | 15.60       | 7.64         | 15.61        | 15.61       | 15.61     | yes          | 1.00       | 1.00       |
| <i>Phataginus tricuspis</i>       | 4.99        | 1.11         | 0.50         | 0.50        | 0.50      | yes          | 1.00       | 1.00       |
| <i>Profelis aurata</i>            | 100.00      | 100.00       | 0.00         | 0.00        | 0.00      | yes          | 1.00       | 1.00       |
| <i>Redunca fulvorifula</i>        | 15.89       | 4.91         | 6.98         | 7.28        | 8.29      | yes          | 1.00       | 1.00       |
| <i>Rhinolophus deckenii</i>       | 12.09       | 6.97         | 0.74         | 0.92        | 0.92      | yes          | 1.00       | 1.00       |
| <i>Rhynchocyon chrysopygus</i>    | 11.37       | 1.71         | 0.10         | 0.10        | 0.10      | yes          | 1.00       | 1.00       |
| <i>Smutsia gigantea</i>           | 2.96        | 2.28         | 0.05         | 0.05        | 0.05      | yes          | 1.00       | 1.00       |
| <i>Smutsia temminckii</i>         | 20.74       | 10.48        | 10.03        | 10.09       | 10.05     | yes          | 1.00       | 1.00       |
| <i>Syncerus caffer</i>            | 18.84       | 9.32         | 12.82        | 12.82       | 12.82     | yes          | 1.00       | 1.00       |
| <i>Taphozous hildegardeae</i>     | 4.70        | 2.00         | 0.50         | 0.51        | 0.51      | yes          | 1.00       | 1.00       |
| <i>Tragelaphus eurycerus</i>      | 84.39       | 55.67        | 0.14         | 0.15        | 0.17      | yes          | 1.00       | 1.00       |
| <i>Tragelaphus imberbis</i>       | 15.63       | 8.40         | 12.21        | 12.21       | 12.21     | yes          | 1.00       | 1.00       |
| <i>Tragelaphus oryx</i>           | 23.62       | 14.99        | 6.81         | 7.06        | 8.59      | yes          | 1.00       | 1.00       |
| <i>Tragelaphus strepsiceros</i>   | 15.27       | 6.91         | 7.88         | 7.88        | 7.88      | yes          | 1.00       | 1.00       |

%Rep\_in\_PAs = % representation in all protected areas (PAs); %Rep\_in\_SPAs = % representation in government protected areas (SPAs); 1/3\_RTtarget = 1/3 species range; BSol\_AllPAs = species range of the 1/3\_RTtarget represented in best solution conservation priority areas when all PAs are locked in; BSol\_SPAs = species range of the 1/3\_RTtarget represented in best solution conservation priority areas when only SPAs are locked in; TargetMet? = whether the 1/3 range representation was met; MPM\_AllPAs and MPM\_[SPAs] = proportion of the 1/3\_RTtarget achieved

**ESM\_8** The association between species richness and PA status year and PA size, for **a)** focal species (as defined in the main text) and **b)** small mammals - Chiroptera and Rodentia orders. The scatter plots are partitioned by PA designation categories. Refer to Fig. 3 in the manuscript for the combined species pool plots.

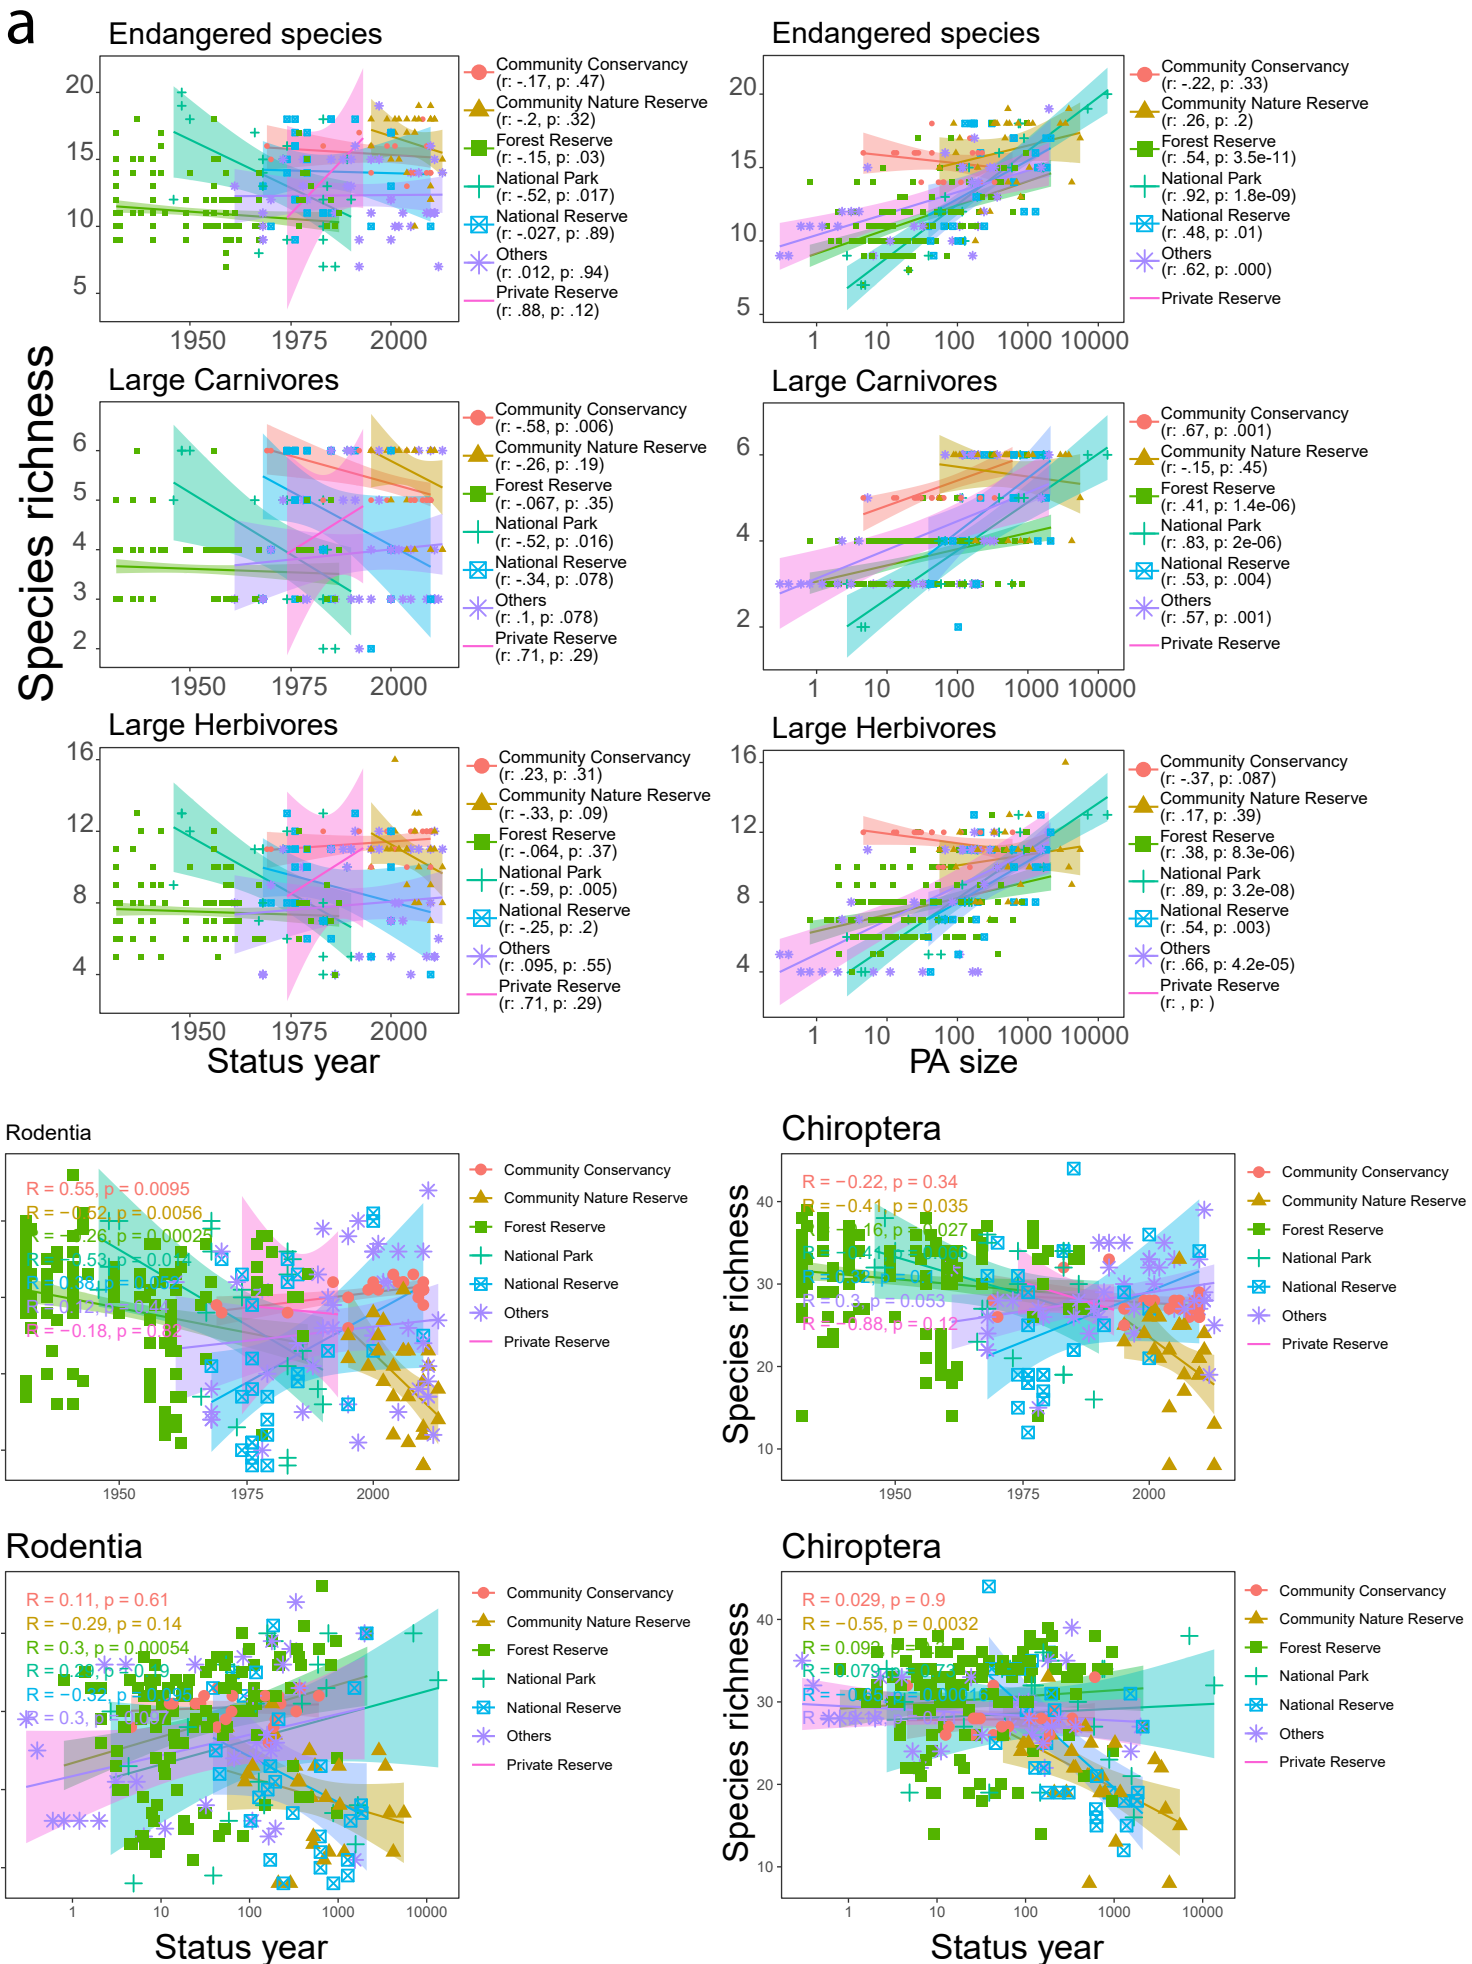

**ESM\_9** Exploring the association between PA governance and designation categories on the diversity of terrestrial mammal in Kenya. The values represent the test for statistical significances of the variance in diversity indices explained by differences in PA governance and designation categorizations. Only metrics that are not highly correlated were included in the analysis [SR, FD<sup>MPD</sup>, NRI, NTI, FD<sup>NRI</sup>, FD<sup>NTI</sup>, see **ESM\_5** above for the bivariate correlation between indices]

|                   |                  | <i>chi-square (p-values)</i> |              |
|-------------------|------------------|------------------------------|--------------|
| Species group     |                  | Governance                   | Designation  |
| AS                | Combined species | 1.456 (0.92)                 | 6.377 (0.38) |
|                   | Large Carnivores | 3.73 (0.59)                  | 4.788 (0.57) |
|                   | Large Herbivores | 2.558 (0.77)                 | 2.431 (0.88) |
|                   | Endangered       | 2.921 (0.71)                 | 3.14 (0.79)  |
| SR                | Combined species | 5.389 (0.37)                 | 10.19 (0.07) |
|                   | Large Carnivores | 5.589 (0.35)                 | 9.23 (0.1)   |
|                   | Large Herbivores | 6.902 (0.23)                 | 7.81 (0.17)  |
|                   | Endangered       | 7.502 (0.19)                 | 24.79 (0)    |
| MPD               | Combined species | 0.036 (1)                    | 0.05 (1)     |
|                   | Large Carnivores | 6.687 (0.25)                 | 19.1 (0)     |
|                   | Large Herbivores | 9.32 (0.1)                   | 19.27 (0)    |
|                   | Endangered       | 0.254 (1)                    | 2.516 (0.78) |
| FD <sup>MPD</sup> | Combined species | 0.001 (1)                    | 0 (1)        |
|                   | Large Carnivores | 0.007 (1)                    | 0.003 (1)    |
|                   | Large Herbivores | 0.021 (1)                    | 0.049 (1)    |
|                   | Endangered       | 0.015 (1)                    | 0.014 (1)    |
| NRI               | Combined species | 0.222 (1)                    | 0.429 (0.99) |
|                   | Large Herbivores | 0.702 (0.98)                 | 0.7 (0.98)   |
|                   | Endangered       | 0.035 (1)                    | 0.178 (1)    |
| NTI               | Combined species | 0.846 (0.97)                 | 0.769 (0.98) |
|                   | Large Herbivores | 0.683 (0.99)                 | 0.67 (0.98)  |
|                   | Endangered       | 0.017 (1)                    | 0.06 (1)     |
| FD <sup>NRI</sup> | Combined species | 0.371 (1)                    | 0.053 (1)    |
|                   | Large Herbivores | 0.698 (0.98)                 | 0.377 (1)    |
|                   | Endangered       | 0.565 (0.99)                 | 0.836 (0.97) |
| FD <sup>NTI</sup> | Combined species | 0.234 (1)                    | 0.368 (1)    |
|                   | Large Herbivores | 0.287 (1)                    | 0.136 (1)    |
|                   | Endangered       | 1.343 (0.93)                 | 0.883 (0.97) |

**ESM\_10** The phylogenetic and functional structure of protected areas in Kenya based on terrestrial mammals. The bar plots show the distribution of phylogenetic [NRI] and functional [FD<sup>NRI</sup>] nearest relative index and phylogenetic [NTI] and functional [FD<sup>NTI</sup>] nearest taxon index shaded by the designation type. -(negative) values indicate overdispersion while +(positive) values indicate clustering. The results are partitioned by various species groups around the so-called focal species as explained in the main text. There are 400 bars each representing a single a protected area.

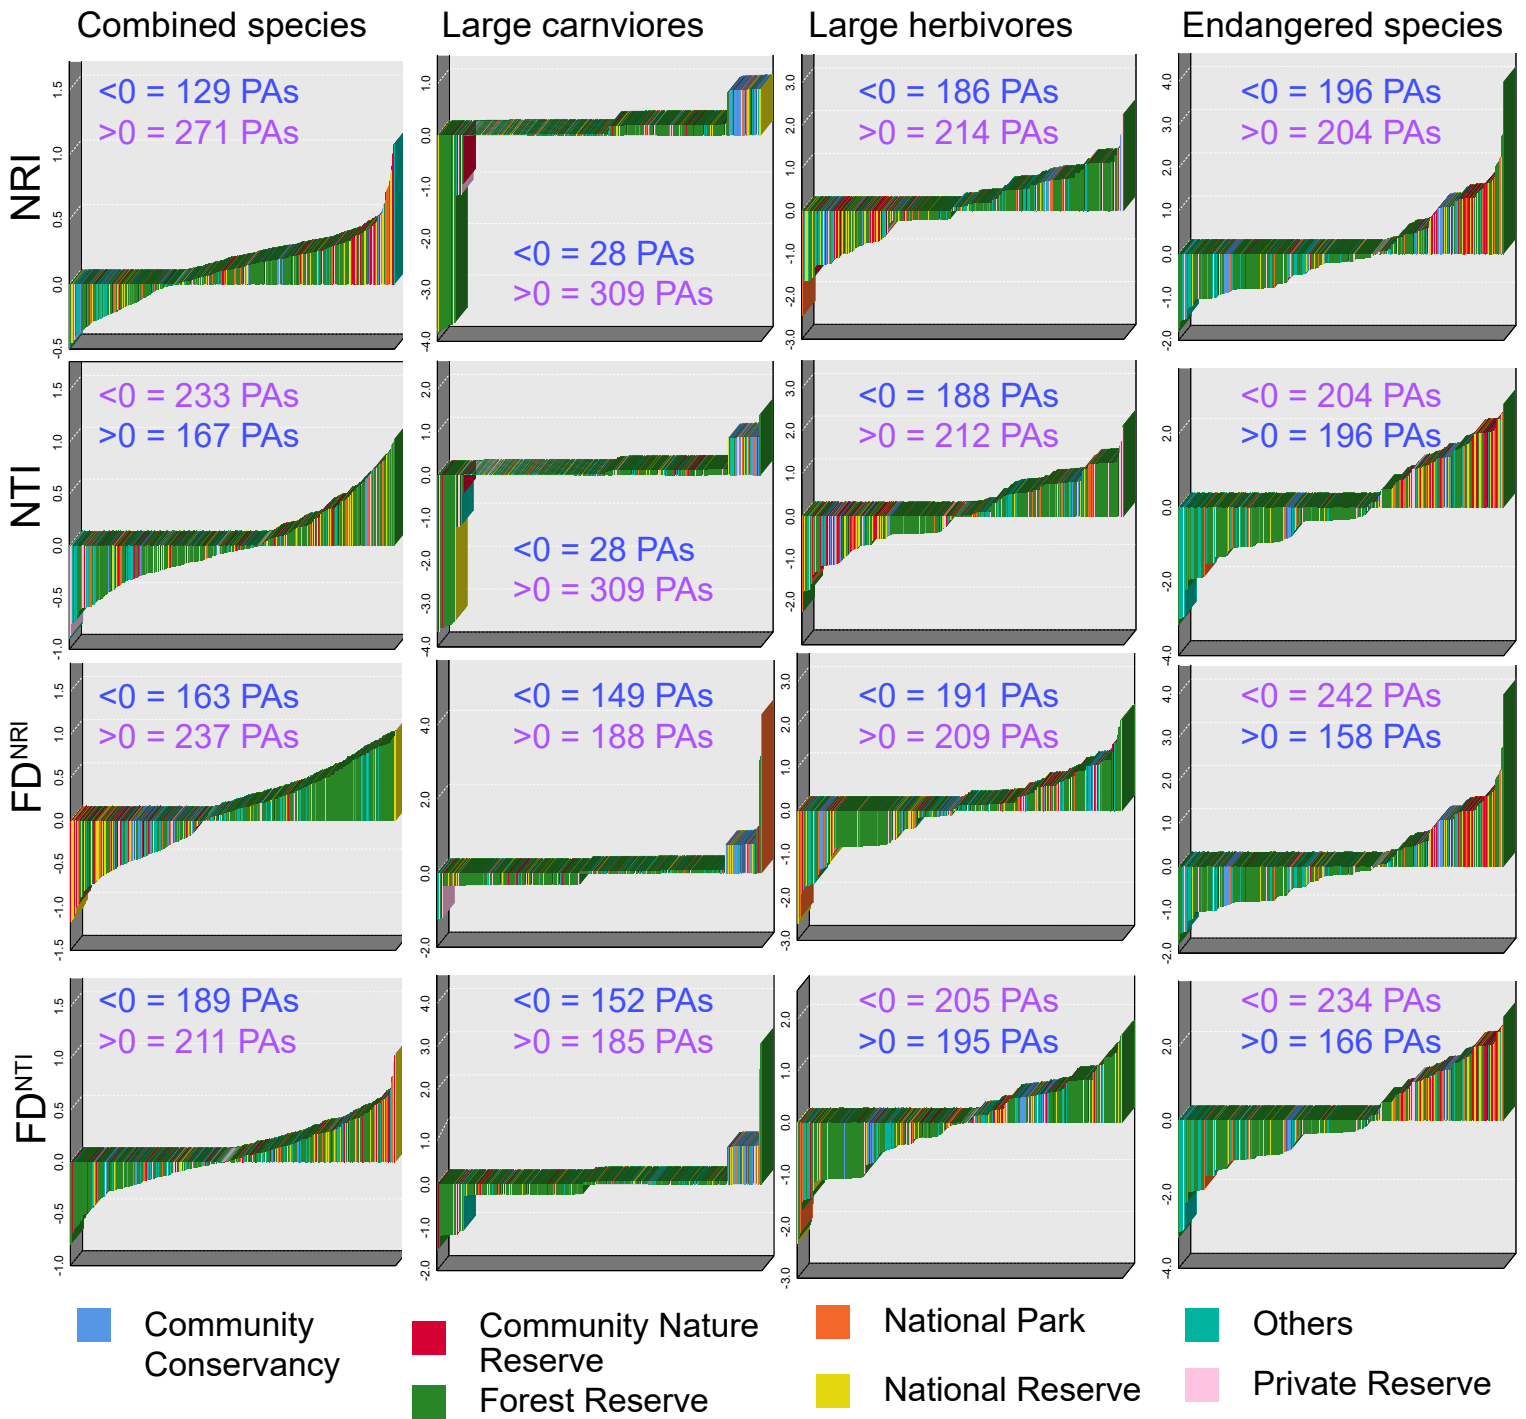

**ESM\_11** Multilevel comparison of diversity indices of terrestrial mammals in PAs in Kenya between governance and designation categories. Comparison was implemented for SR and the diversity indices not highly correlated with SR [see Online Resource 6 for the correlations between diversity indices]

| PA category pairs                            | [SR, MPD, $FD^{MPD}$ , NRI, NTI, $FD^{NRI}$ , and $FD^{NTI}$ ] |          |           |              |              | [Turnover, Uniqueness, and Completeness] |          |           |              |              |              |
|----------------------------------------------|----------------------------------------------------------------|----------|-----------|--------------|--------------|------------------------------------------|----------|-----------|--------------|--------------|--------------|
|                                              | <i>SS</i>                                                      | <i>F</i> | <i>R2</i> | <i>p</i>     | <i>padj</i>  | <i>SS</i>                                | <i>F</i> | <i>R2</i> | <i>p</i>     | <i>padj</i>  |              |
| Governance                                   | Government vs Indigenous peoples                               | 4994.7   | 12.499    | 0.036        | <b>0.002</b> | <b>0.02</b>                              | 0.269    | 9.75      | 0.028        | 0.004        | 0.06         |
|                                              | Government vs Nonprofit organizations                          | 756.2    | 1.92      | 0.006        | 0.166        | 1                                        | 0.069    | 2.565     | 0.008        | 0.118        | 1            |
|                                              | Government vs Individual or Community                          | 488.2    | 1.246     | 0.004        | 0.245        | 1                                        | 0.078    | 2.894     | 0.009        | 0.088        | 1            |
|                                              | Government vs Local communities                                | 133.3    | 0.334     | 0.001        | 0.581        | 1                                        | 0.032    | 1.175     | 0.003        | 0.258        | 1            |
|                                              | Indigenous people vs Nonprofit organizations                   | 4550.1   | 19.363    | 0.326        | <b>0.001</b> | <b>0.01</b>                              | 0.278    | 15.524    | 0.28         | <b>0.001</b> | <b>0.015</b> |
|                                              | Indigenous people vs Individual or Community                   | 3985.9   | 18.27     | 0.314        | <b>0.001</b> | <b>0.01</b>                              | 0.246    | 14.876    | 0.271        | <b>0.001</b> | <b>0.015</b> |
|                                              | Indigenous people vs Local communities                         | 1902.1   | 6.269     | 0.111        | <b>0.018</b> | 0.18                                     | 0.123    | 5.525     | 0.1          | <b>0.026</b> | 0.39         |
|                                              | Nonprofit organizations vs Individual or Community             | 15.6     | 0.163     | 0.005        | 0.732        | 1                                        | 0.008    | 1.198     | 0.038        | 0.28         | 1            |
|                                              | Nonprofit organizations vs Local communities                   | 867.1    | 3.729     | 0.085        | 0.067        | 0.67                                     | 0.053    | 3.282     | 0.076        | 0.075        | 1            |
| Individual or Community vs Local communities | 631.1                                                          | 2.926    | 0.068     | 0.094        | 0.94         | 0.038                                    | 2.59     | 0.061     | 0.106        | 1            |              |
| Designation                                  | Forest Reserve vs National Park                                | 156.1    | 0.423     | 0.002        | 0.526        | 1                                        | 0.027    | 1.067     | 0.004        | 0.3          | 1            |
|                                              | Forest Reserve vs National Reserve                             | 3418.9   | 9.969     | 0.037        | <b>0.002</b> | <b>0.042</b>                             | 0.204    | 8.744     | 0.032        | <b>0.005</b> | 0.105        |
|                                              | Forest Reserve vs Community Nature Reserve                     | 5775     | 17.897    | 0.065        | <b>0.001</b> | <b>0.021</b>                             | 0.3      | 13.384    | 0.049        | <b>0.001</b> | <b>0.021</b> |
|                                              | Forest Reserve vs Private Reserve                              | 36.4     | 0.116     | 0            | 0.746        | 1                                        | 0.023    | 1.067     | 0.004        | 0.307        | 1            |
|                                              | Forest Reserve vs Community Conservancy                        | 2432.3   | 8.106     | 0.031        | <b>0.005</b> | 0.105                                    | 0.239    | 11.581    | 0.044        | <b>0.002</b> | <b>0.042</b> |
|                                              | National Park vs National Reserve                              | 968.4    | 1.522     | 0.029        | 0.2          | 1                                        | 0.058    | 1.29      | 0.025        | 0.273        | 1            |
|                                              | National Park vs Community Nature Reserve                      | 2013.5   | 3.692     | 0.071        | 0.07         | 1                                        | 0.14     | 3.44      | 0.067        | 0.06         | 1            |
|                                              | National Park vs Private Reserve                               | 169.4    | 0.31      | 0.008        | 0.555        | 1                                        | 0.053    | 1.327     | 0.035        | 0.28         | 1            |
|                                              | National Park vs Community Conservancy                         | 2108     | 4.818     | 0.101        | <b>0.035</b> | 0.735                                    | 0.217    | 6.720     | 0.135        | <b>0.008</b> | 0.168        |
|                                              | National Reserve vs Community Nature Reserve                   | 240.5    | 0.605     | 0.011        | 0.449        | 1                                        | 0.042    | 1.513     | 0.027        | 0.204        | 1            |
|                                              | National Reserve vs Private Reserve                            | 1723     | 4.771     | 0.098        | <b>0.031</b> | 0.651                                    | 0.153    | 6.372     | 0.126        | <b>0.016</b> | 0.336        |
|                                              | National Reserve vs Community Conservancy                      | 6316.5   | 21.764    | 0.303        | <b>0.001</b> | <b>0.021</b>                             | 0.489    | 25.31     | 0.336        | <b>0.001</b> | <b>0.021</b> |
|                                              | Community Nature Reserve vs Private Reserve                    | 2886.9   | 12.308    | 0.231        | <b>0.001</b> | <b>0.021</b>                             | 0.175    | 9.786     | 0.193        | <b>0.006</b> | 0.126        |
|                                              | Community Nature Reserve vs Community Conservancy              | 8453     | 48.231    | 0.506        | <b>0.001</b> | <b>0.021</b>                             | 0.536    | 39.138    | 0.454        | <b>0.001</b> | <b>0.021</b> |
| Private Reserve vs Community Conservancy     | 830                                                            | 13.258   | 0.269     | <b>0.002</b> | <b>0.042</b> | 0.057                                    | 12.176   | 0.253     | <b>0.002</b> | <b>0.042</b> |              |

MPD = phylogenetic mean pairwise distance,  $FD^{MPD}$  = functional mean pairwise distance, NRI = phylogenetic nearest relative index, NTI = phylogenetic nearest taxon distance,  $FD^{NRI}$  = functional phylogenetic nearest relative index, and  $FD^{NTI}$  = functional phylogenetic nearest taxon distance
